# Supplementary material
Source: PubMed Central journal article supplement (PMC3203318)
Supplement: NIHMS310344-supplement-Supp_Table_S1.pdf [file NIHMS310344-supplement-Supp_Table_S1.pdf]

Supplemental Table 1

| Gene                | full name                                            | Species | GenBank ID | Affy matrix ID |
|---------------------|------------------------------------------------------|---------|------------|----------------|
| <i>APG5</i>         | autophagy related 5 homolog                          | Human   |            | 202511_s_at    |
| <i>ATG4b</i>        | autophagy related 4 homolog B                        | Human   |            | 212280_x_at    |
|                     |                                                      | Mouse   | AV240631   | 1424103_at     |
| <i>Atg5</i>         | autophagy related 5 homolog                          | Mouse   | AV168389   | 1418235_at     |
|                     |                                                      | Mouse   | AV168389   | 1418236_s_at   |
| <i>Atg7</i>         | autophagy related 7 homolog                          | Mouse   | AW549826   | 1428612_at     |
| <i>DR5</i>          | Death Receptor 5                                     | Human   |            | 209295_at      |
| <i>Gabarap</i>      | gamma-aminobutyric acid receptor-associated protein  | Mouse   | BC024621   | 1416937_at     |
|                     |                                                      | Human   |            | 200645_at      |
| <i>Gabarapl1</i>    | GABA(A) receptor-associated protein like 1           | Mouse   | AF180518   | 1416418_at     |
|                     |                                                      | Mouse   | BE979373   | 1442572_at     |
| <i>LAMP1</i>        | Lysosomal-associated membrane protein 1              | Human   |            | 201553_s_at    |
| <i>LAMP2</i>        | Lysosomal-associated membrane protein 2              | Human   |            | 203041_s_at    |
| <i>Map1lc3a</i>     | microtubule-associated protein 1 light chain 3 alpha | Mouse   | BB299566   | 1447883_x_at   |
|                     |                                                      | Mouse   | BC010596   | 1451290_at     |
| <i>Pik3c3</i>       | phosphoinositide-3-kinase, class 3                   | Mouse   | BC024675   | 1425580_a_at   |
| <i>PIK3K3</i>       | Phosphoinositide-3-kinase, class 3                   | Human   |            | 204297_at      |
| <i>Pik3r4</i>       | phosphoinositide-3-kinase, regulatory subunit 4      | Mouse   | BC017537   | 1460352_s_at   |
| <i>Rab24</i>        | member RAS oncogene family                           | Mouse   | NM_009000  | 1421873_s_at   |
| <i>Sim to LAMP1</i> | Similar to Lysosomal-associated membrane protein 1   | Human   |            | 213728_at      |
| <i>Ulk2</i>         | unc-51-like kinase 2                                 | Mouse   | BB232686   | 1447152_at     |
| <i>Wipi1</i>        | WD repeat domain, phosphoinositide interacting 1     | Mouse   | BC025560   | 1424917_a_at   |
|                     |                                                      | Mouse   | BI251603   | 1439060_s_at   |
|                     |                                                      | Mouse   | BI251603   | 1456624_at     |
| <i>WIPI2</i>        | WD repeat domain, phosphoinositide interacting 2     | Human   |            | 202031_s_at    |
