# Supplementary material
Source: PubMed Central journal article supplement (PMC3203318)

Supplementary figure 1

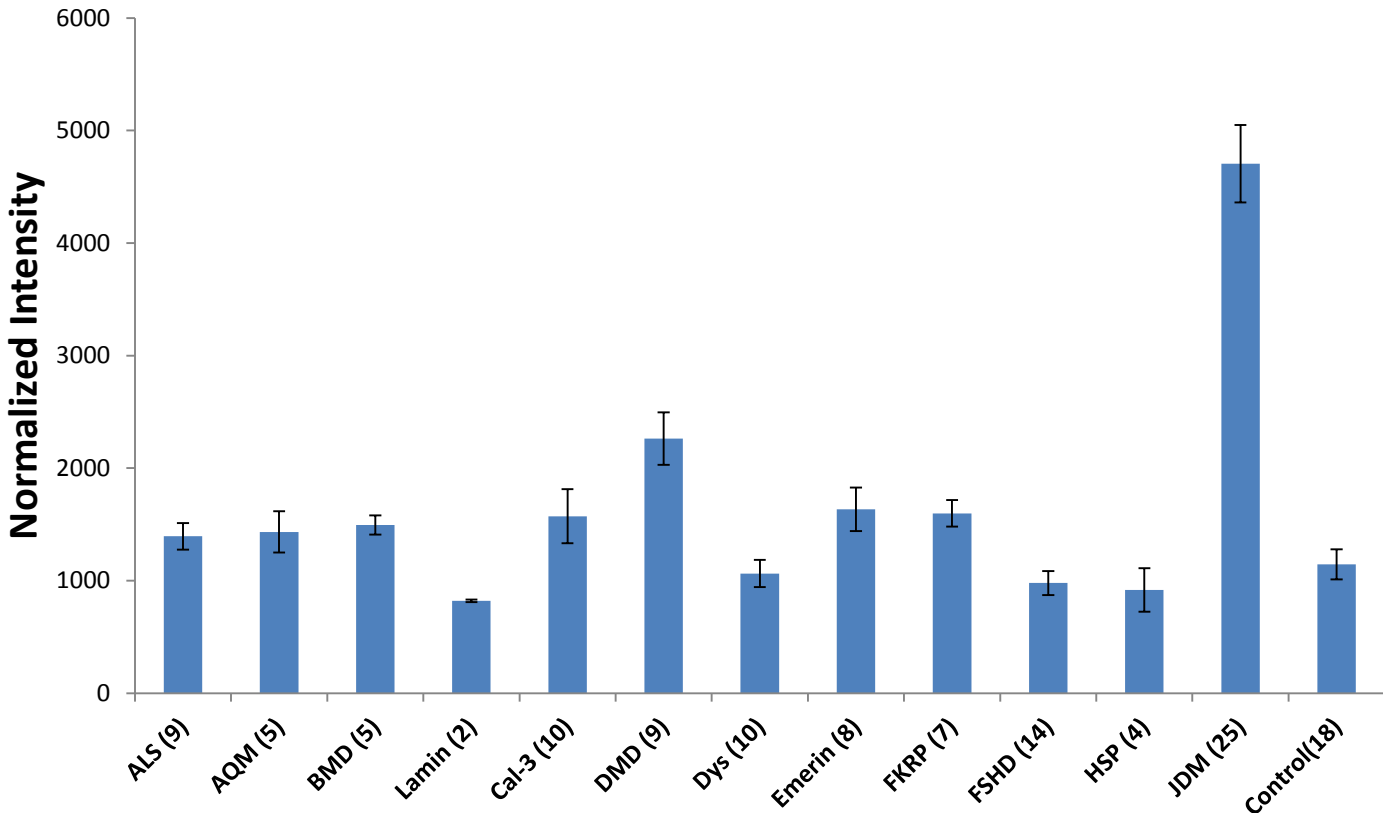

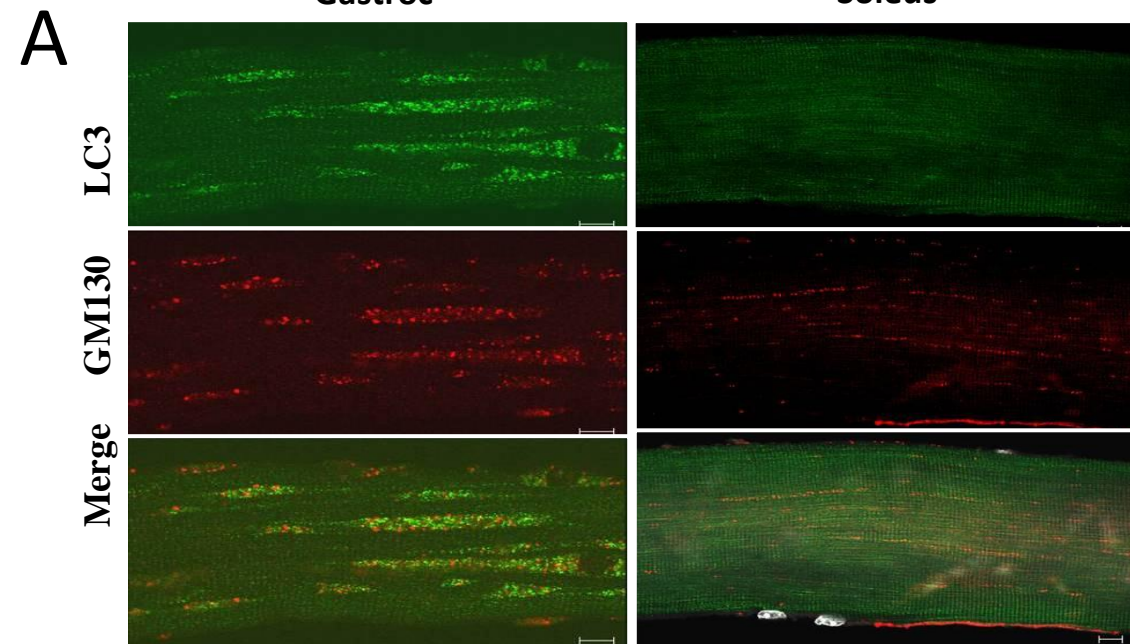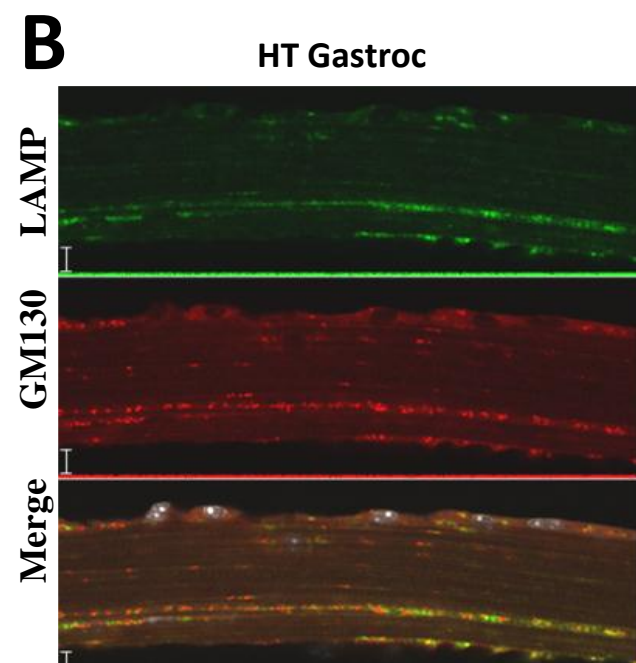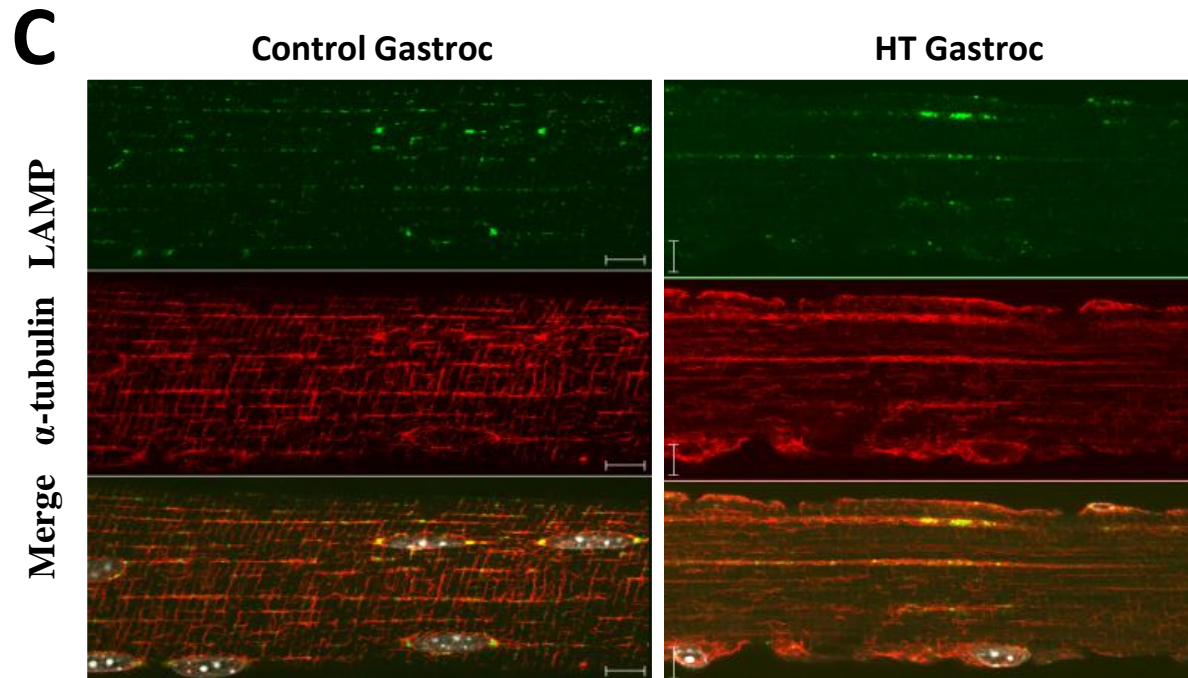

Supplementary figure 3

**A**

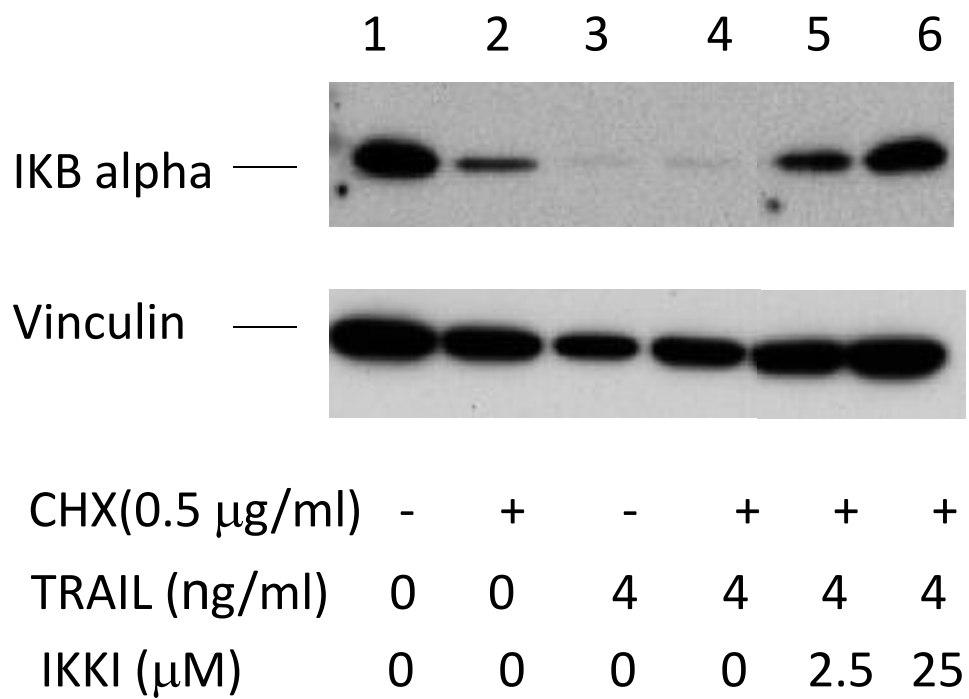

**B**

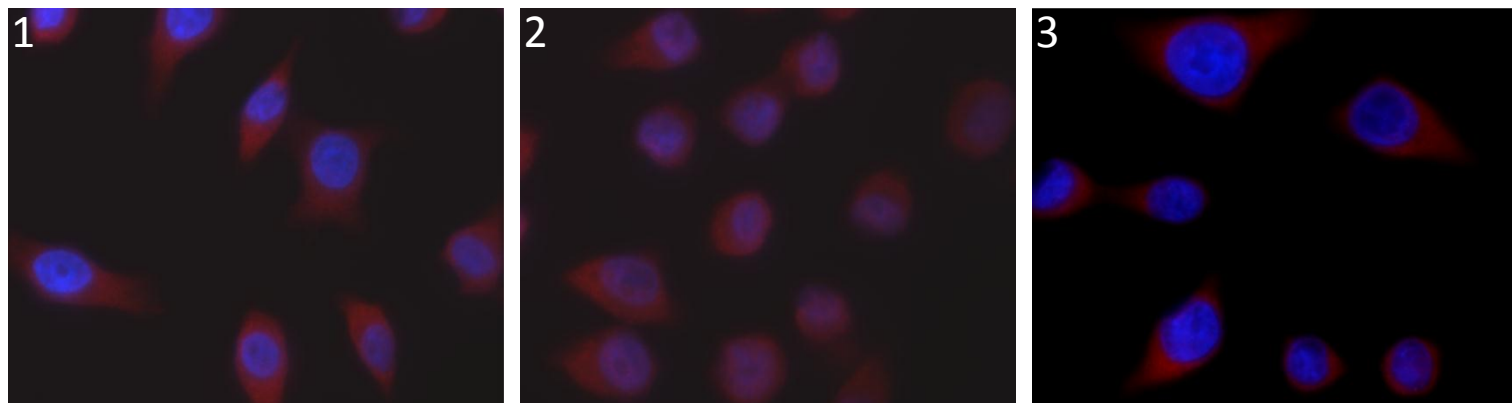

Supplementary figure 4

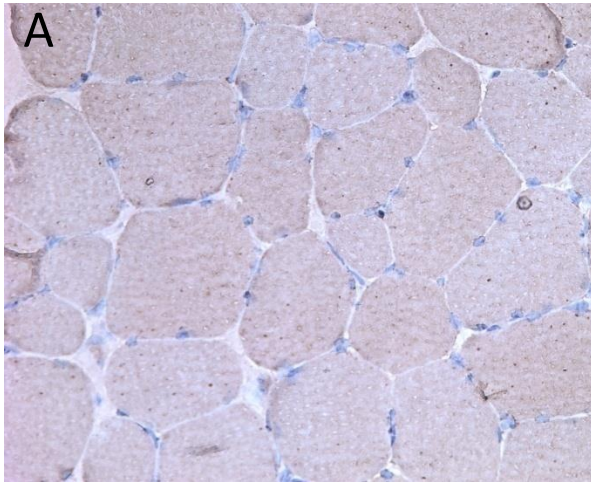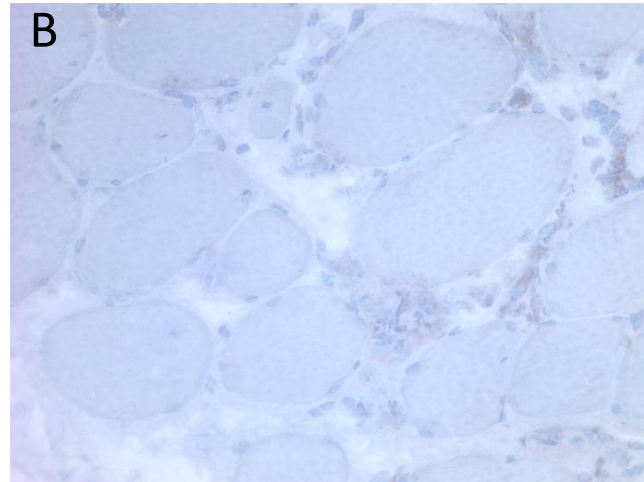

Supplement: NIHMS310344-supplement-Supp_Figure_S1-S4.pdf [file NIHMS310344-supplement-Supp_Figure_S1-S4.pdf]
